# Supplementary material
Source: PubMed Central journal article supplement (PMC2532589)

# ProQuant/Spectrum Mill comparison: iTRAQ ratios

### Day 4 vs day 0

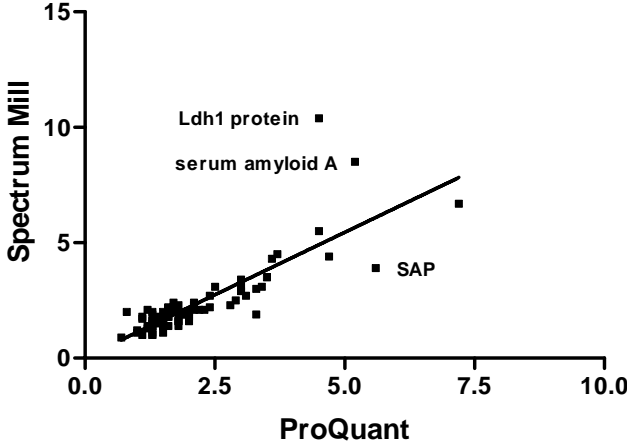

### Day 8 vs day 0

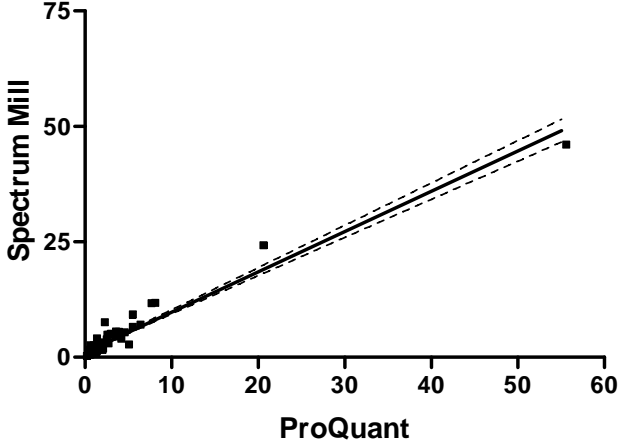

### Day 12 vs day 0

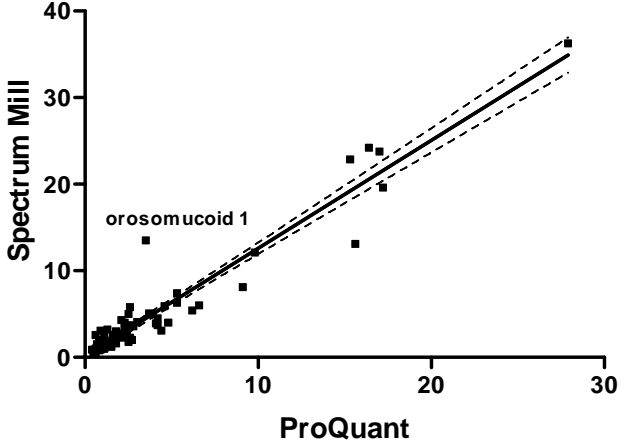

## ProQuant/Spectrum Mill comparison: number of peptides/protein

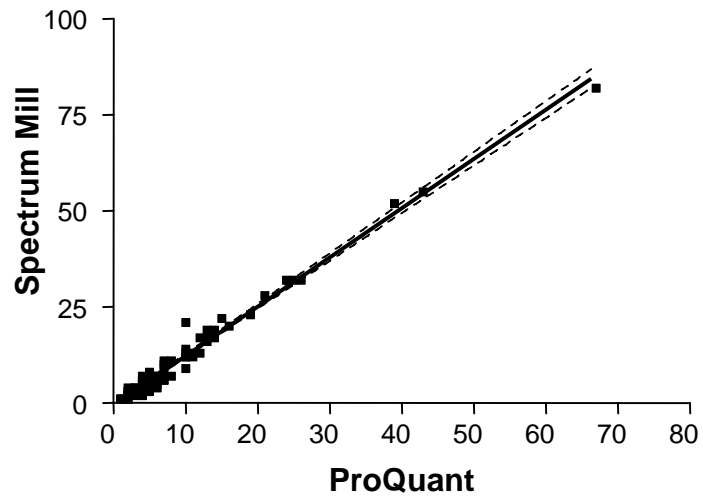

Supplement: NIHMS62938-supplement-1si20070119_09.pdf [file NIHMS62938-supplement-1si20070119_09.pdf]
