# Supplementary material
Source: PubMed Central journal article supplement (PMC2532589)

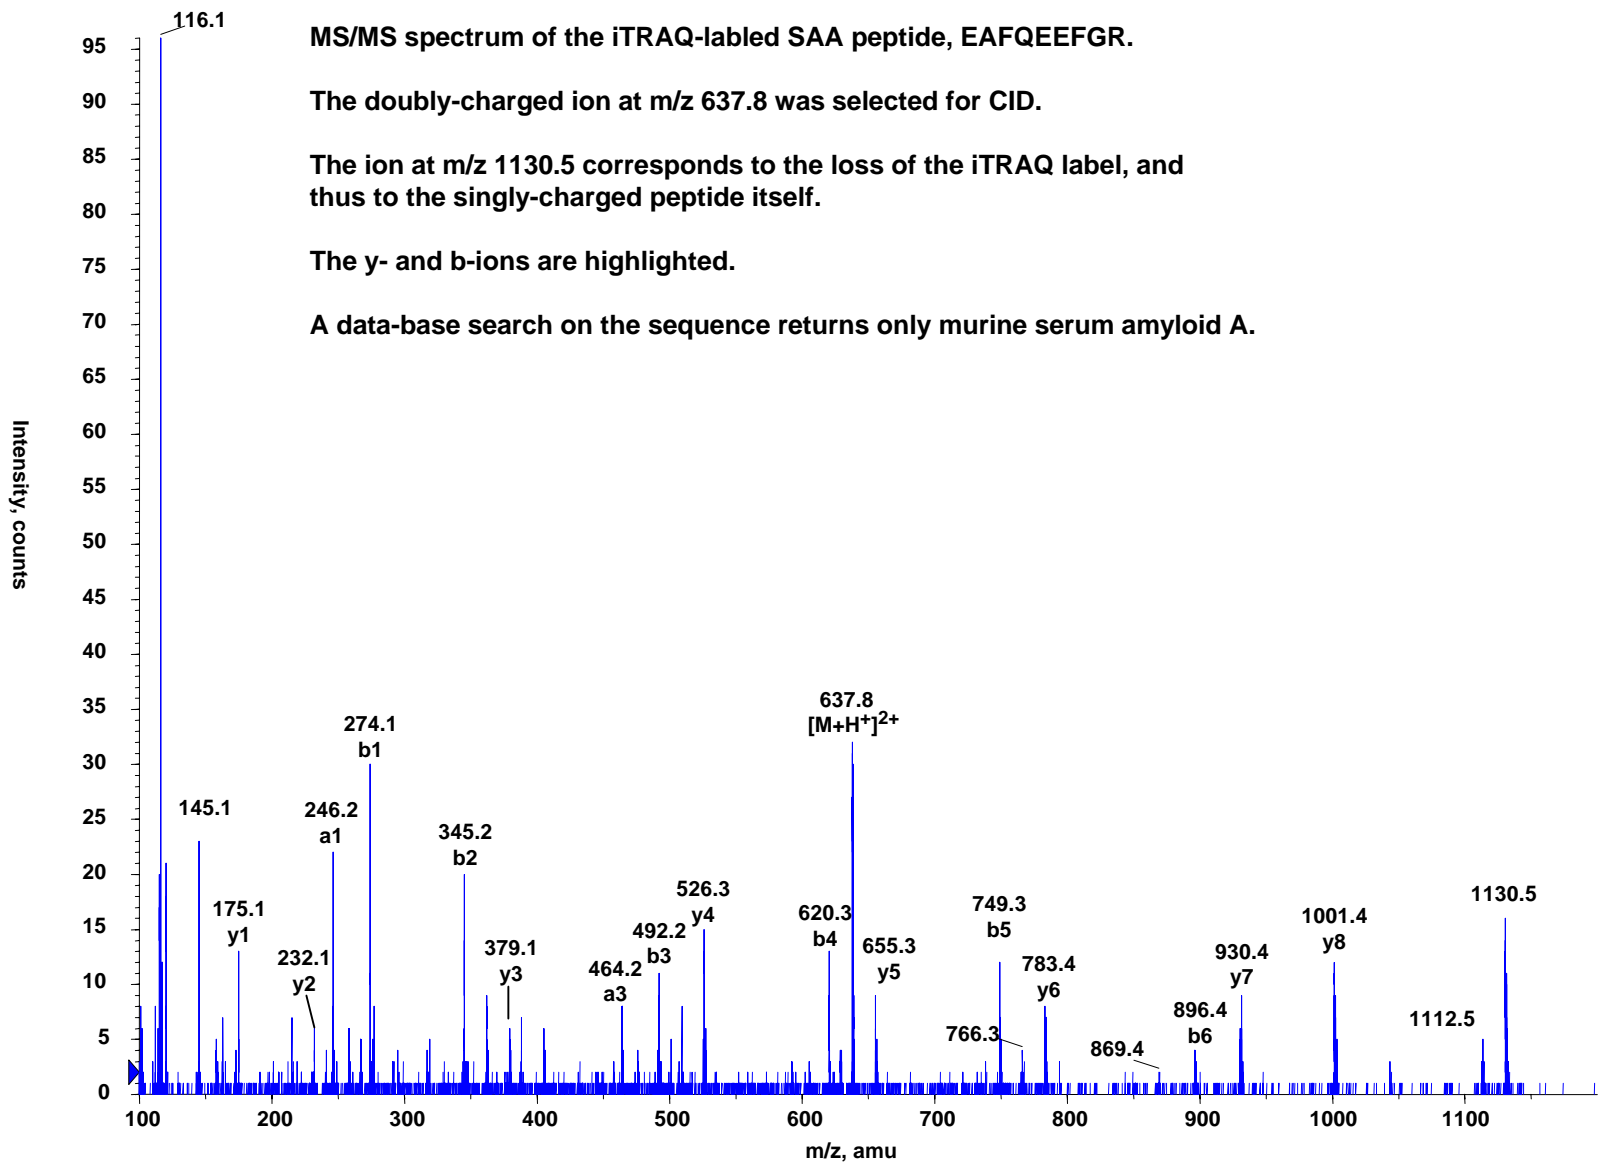

Supplement: NIHMS62938-supplement-2si20070119_09.pdf [file NIHMS62938-supplement-2si20070119_09.pdf]
